# Supplementary material
Source: PubMed Central journal article supplement (PMC4644443)
Supplement: NIHMS727806-supplement-2.pdf [file NIHMS727806-supplement-2.pdf]

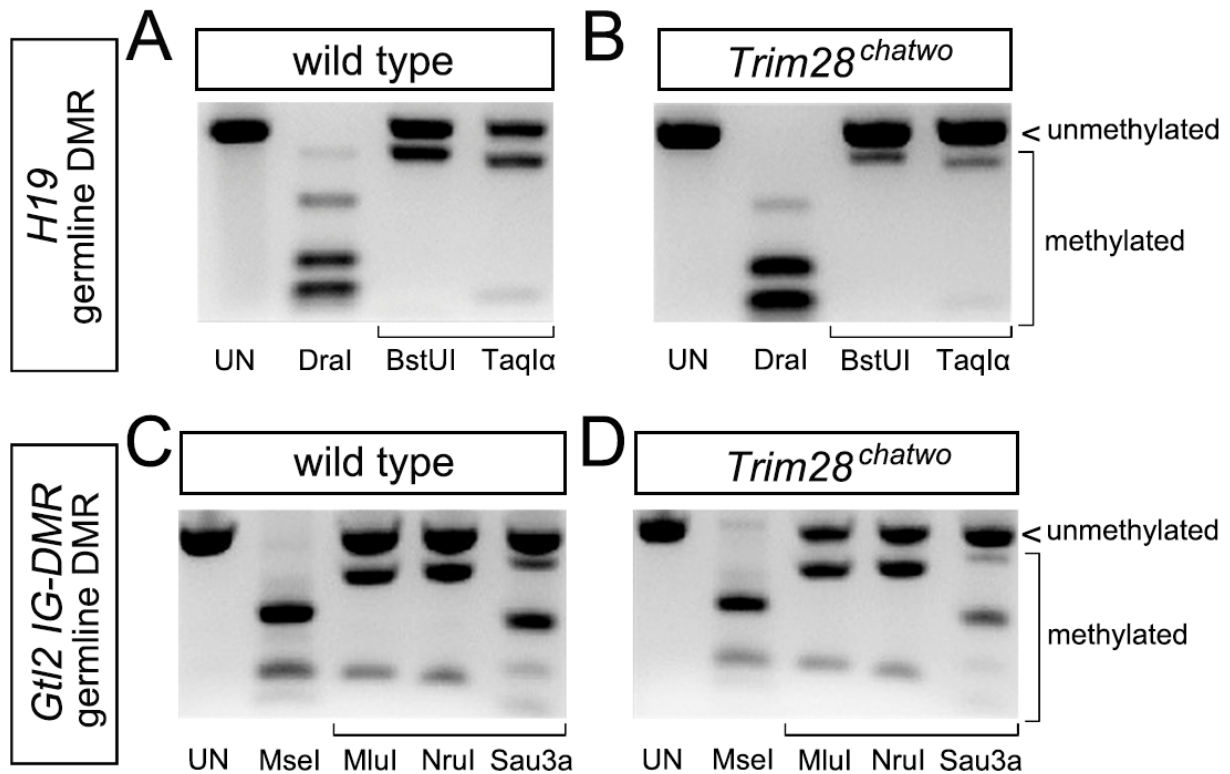

**Figure S1. DNA methylation at the *H19* and *Gtl2* germline DMRs in *Trim28<sup>chatwo</sup>* embryos. Related to Figure 3.** DNA methylation at the *H19* (A-B) and *Gtl2* (C-D) germline DMRs was detected by combined restriction-bisulfite analysis (COBRA) in wild type (A, C) and *Trim28<sup>chatwo</sup>* (B, D) embryos. Analysis was done on pools of 2-3 embryos collected at E8.5. Restriction with *DraI* (A-C) and *MseI* (D-F) measured the efficiency of bisulfite conversion. All other restriction enzymes (lanes with brackets) recognize the PCR product only if the original template contained methylated CpG dinucleotides. UN-undigested.

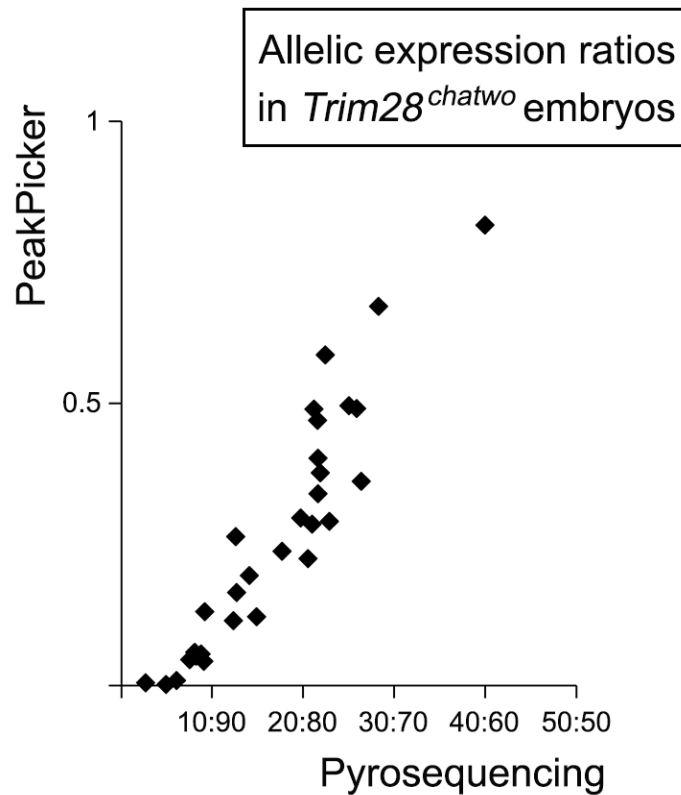

**Figure S2. Relationship between PeakPicker and pyrosequencing quantification of allelic expression. Related to Figure 4.** Graph showing pyrosequencing versus PeakPicker quantification of allelic expression ratios from analysis of the *H19*, *Gtl2*, and *Snrpn* imprinted genes in *Trim28*<sup>chatwo</sup> embryos. Note that PeakPicker uses Sanger sequencing chromatograms to calculate the relative SNP allele ratio normalized to control peaks and produces a value between 0 (monoallelic expression) and 1 (equal expression from both alleles). In contrast, pyrosequencing provides a ratio that represents the relative expression from each allele, with values that range from 0:100 (monoallelic expression) to 50:50 (equal expression from each allele). Data shows a strong correlation between the two methods ( $p < 0.0001$ ).

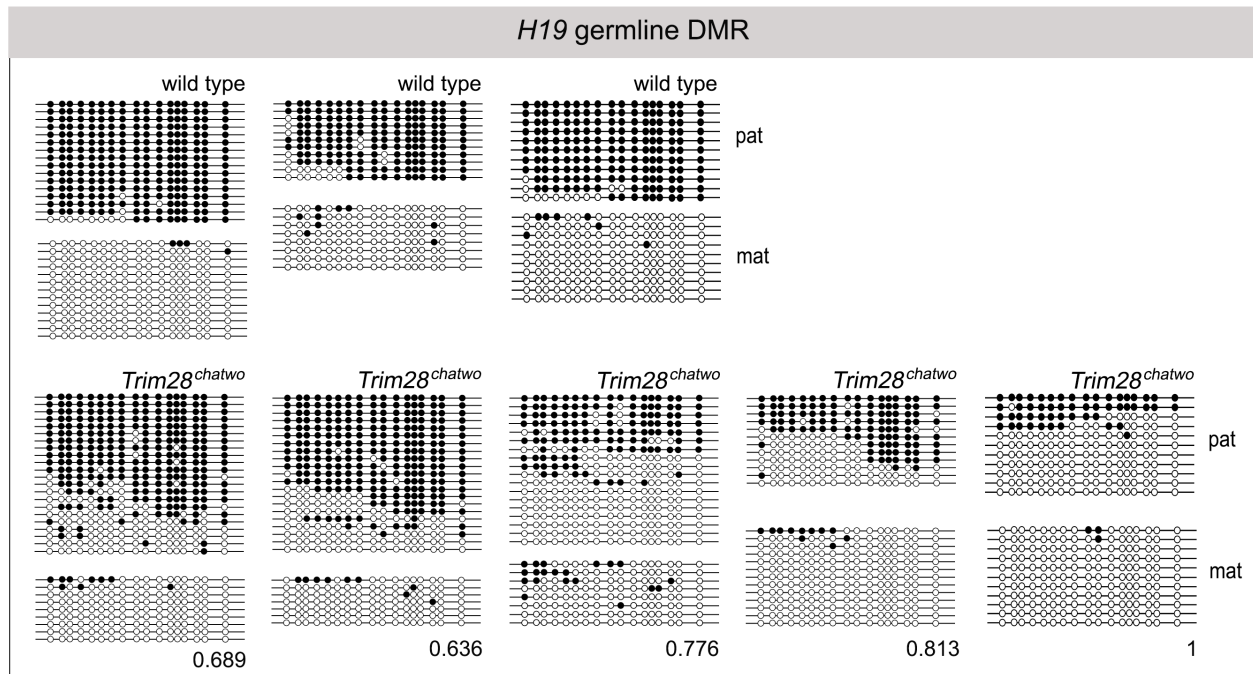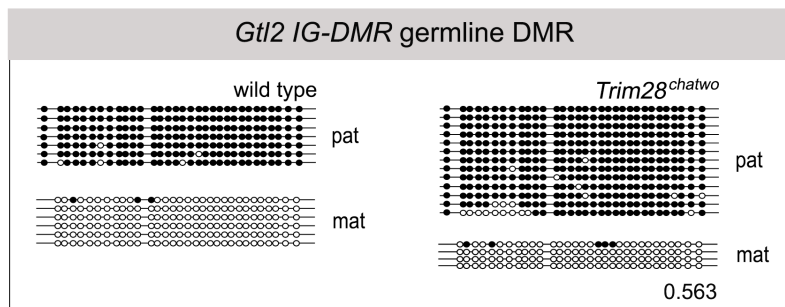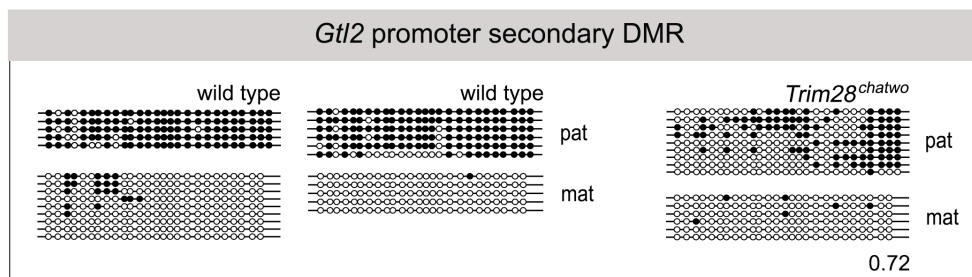

**Figure S3. Bisulfite sequencing analysis of DNA methylation in *Trim28<sup>chatwo</sup>* embryos. Related to Figures 4 & 5.** Results from the analysis of DNA methylation at the *H19* germline DMR, the *Gtl2* germline DMR, and the *Gtl2* secondary DMR in additional wild type and *Trim28<sup>chatwo</sup>* embryos to those shown in Figures 4 and 5. Methylated DNA is represented by filled circles. Unmethylated DNA is represented by empty circles. Maternal (mat) and paternal (pat) alleles were identified by allele-specific polymorphisms. The numbers at the bottom of each methylation plot indicate the PeakPicker allelic expression ratio for that particular embryo.

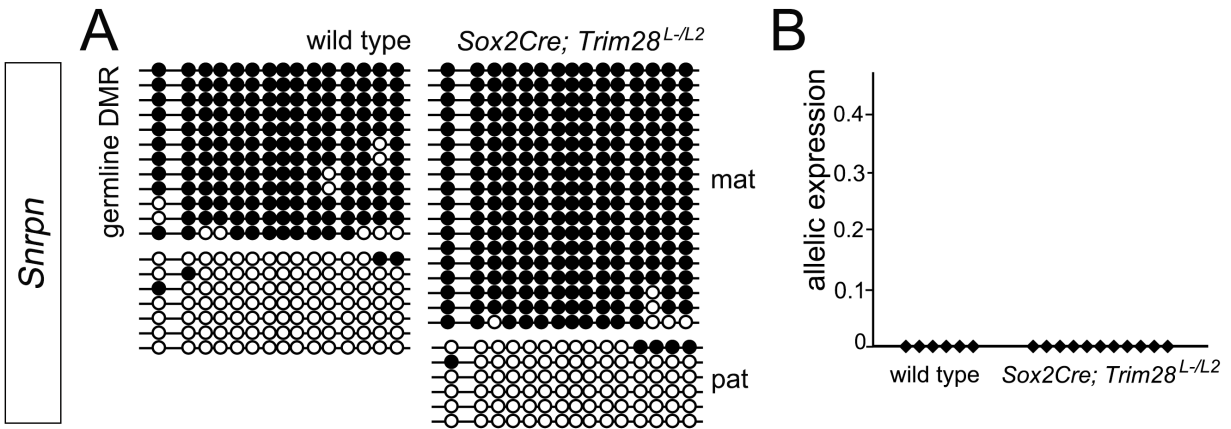

**Figure S4. *Snrpn* DNA methylation and allelic expression in *Sox2Cre;Trim28<sup>L-/L2</sup>* embryos. Related to Figure 7. (A) Allele-specific DNA methylation of the *Snrpn* germline DMR as measured by bisulfite sequencing in wild type and *Sox2Cre;Trim28<sup>L-/L2</sup>* embryos. (B) *Snrpn* allelic expression ratios as quantified using the PeakPicker program. n = number of embryos analyzed.**

### Allelic Expression (Sanger Sequencing)

|                        | Primer1                | Primer2                   | SNP position (mm10)     | SNP   | Background | Source                                     |
|------------------------|------------------------|---------------------------|-------------------------|-------|------------|--------------------------------------------|
| <i>H19</i>             | actgaagcgaggatgacag    | gttcaaggtagggggaggag      | 7: 142576519            | G/A   | FVB/CAST   |                                            |
| <i>Gtl2</i>            | gccaaagccatcatctggaatc | cacagatgtagactcaacagtgaag | 12: 109571394           | T/C   | FVB/CAST   | Schmidt et al., 2000                       |
| <i>Snrpn</i>           | cccaccaggaattagaggc    | gcagtaaggggggtcaaaagc     | 7: 59983201             | C/T   | FVB/CAST   | Szabo and Mann, 1995; Doherty et al., 2000 |
| <i>Gnas (Paternal)</i> | ctggcagtgagatcagtgga   | aaaatcgctgggtggaagg       | 2: 174298128, 174298129 | TT/GA | FVB/CAST   |                                            |
| <i>Airn</i>            | cacaggcaaaacacctaca    | ctcggcagagaaagtgttgg      | 17: 12816566            | T/C   | FVB/CAST   |                                            |
| <i>Kcnq1ot1</i>        | ccaccagcctcagcatattt   | gaaacgatccacacgggaagt     | 7: 143296059            | T/C   | FVB/CAST   |                                            |
| <i>Peg3</i>            | gggggagaatctccattta    | tgggaactgaaaactgaca       | 7: 6709700              | G/C   | FVB/BL6    |                                            |
| <i>Peg10</i>           | atgattttgaccacagatcc   | tcaggcagaatggtgacaaa      | 6: 4757990              | C/T   | FVB/BL6    |                                            |
| <i>Rasgrf1</i>         | ggctcatgatgaatgccttt   | tacagaagcttggcgttgg       | 9: 89991554             | T/C   | FVB/BL6    |                                            |

### Allelic Expression (Quantitative pyrosequencing)

|              | Primer1                | Primer2                           | Pyro Primer          | SNP position (mm10) | SNP | Background |
|--------------|------------------------|-----------------------------------|----------------------|---------------------|-----|------------|
| <i>H19</i>   | TTTGGAGTCCCGAGATAGCTTT | [Biotin-5]GCAAAGGATGAAGTAGGGCATGT | CCCAGTACCCACTGT      | 7: 142575460        | C/T | FVB/CAST   |
| <i>Gtl2</i>  | CCAGGACCTCCAACGTGAAA   | [Biotin-5]TCAGTCAGTAGTGGGTCTCTCT  | GAATAGTAGTGGAAATGTGT | 12: 109571145       | T/C | FVB/CAST   |
| <i>Snrpn</i> | CTTGCTACGTGGGAGAACTT   | [Biotin-5]TAGGTACACCTGTGGCACTC    | GGCCCTCACAGTCA       | 7: 59986552         | T/G | FVB/CAST   |

### Quantitative Reverse Transcriptase PCR

|                   | Primer1               | Primer2              | Source              |
|-------------------|-----------------------|----------------------|---------------------|
| <i>H19</i>        | ttgcactaagtcgattgcact | ggaactgctccagactaggc |                     |
| <i>Igf2</i>       | tttgctgcatcgtccttac   | tagacacgtccctctcgact |                     |
| <i>Gtl2</i>       | ggcgccacacagaagaa     | ggtgtgagccgatgatgca  |                     |
| <i>Dlk1</i>       | ttaccggggttccttagagc  | tgcatatagggggaagg    |                     |
| <i>Rian</i>       | tcgagacacaagaggactcc  | attggaagtctgagccatgg | Sekita et al., 2005 |
| <i>Mirg</i>       | ccttctgactctcctgctt   | gtgggagtgaaacatgggt  | Wu et al., 2006     |
| <i>Peg3</i>       | cacgaagcagcaccaacag   | gtctcagagctccacatctc | Shule et al., 2007  |
| <i>Mest</i>       | atcccgtgctcttctca     | aggcagcaagcagcaact   |                     |
| <i>Impact</i>     | aagaacgcgcagactatcg   | ttatttctccaccactggt  |                     |
| <i>Snrpn</i>      | ttggtctgaggagtattgct  | ccttgaattccaccacttg  | Tsai et al., 1999   |
| <i>Peg10</i>      | gtctactctggcaatgg     | gggaccttattctctg     | Zaiton et al., 2010 |
| <i>Airn</i>       | gtgattcaggtttcatg     | ggcccagatataagaatg   |                     |
| <i>Igf2r</i>      | tagttcagctcttgcacg    | acagctcaaacctgaagcg  |                     |
| <i>IAP 5' UTR</i> | cggtcgcgtaataaaaggt   | actctgctcccagctgaa   | Rowe et al., 2010   |
| <i>Actin</i>      | aagtgcgcttgacatccg    | gatccacatctgctggaagg |                     |

### Bisulfite Sequencing and COBRA

|                             | Primer1                  | Primer2                      | Background |
|-----------------------------|--------------------------|------------------------------|------------|
| <i>H19</i> primary outer    | gagttattaggaggtataagaatt | atcaaaaaactaacataaacctt      | FVB/CAST   |
| <i>H19</i> primary inner    | gtaaggagattatgttttttgg   | cctcattaatcccataactat        | FVB/CAST   |
| <i>H19</i> secondary outer  | gactggtcagccctgagtc      | cctcaccacaactcccactt         | FVB/CAST   |
| <i>H19</i> secondary inner  | ggtgaggagtcccataa        | gagctagccctcagctctt          | FVB/CAST   |
| <i>Gtl2</i> primary outer   | agatgtgttggaatttaggttag  | ctaaactacaatctataatcacaac    | FVB/CAST   |
| <i>Gtl2</i> primary inner   | aagtgtgtgtttttatgggtaag  | ccattcccaactataaaaatatttaacc | FVB/CAST   |
| <i>Gtl2</i> secondary outer | gaagaatttttatttggtagtg   | caacactcaaatcaccctccc        | FVB/CAST   |
| <i>Gtl2</i> secondary inner | gttgaaggatgtgtaaaatg     | ccccccacatctattctacc         | FVB/CAST   |

### PyroMark

|                            | Primer1                     | Primer2                               | Pyro Primer             |
|----------------------------|-----------------------------|---------------------------------------|-------------------------|
| <i>H19</i> primary pyro    | gattatgggattatagatggtgat    | [Biotin-5]aatcaaaaaatccactactctctcaaa | aggggagaaaatttaattag    |
| <i>H19</i> secondary pyro  | agttagggttttttaattggagtg    | [Biotin-5]aaaacaataccaaccctatcta      | tttgttaataattagtatatggt |
| <i>Gtl2</i> primary pyro   | ggttatagtgagatagtttagtg     | [Biotin-5]cttccctcactccaaaaat         | gttatggatggtgtaag       |
| <i>Gtl2</i> secondary pyro | ttgtagttgggtgaggtatagtaattg | [Biotin-5]aaccactcaaaaataaaaaattctcta | tttatttagtttttttagtatag |

### Genotyping

|                        | Primer1                    | Primer2                  | Source               | Notes                                                    |
|------------------------|----------------------------|--------------------------|----------------------|----------------------------------------------------------|
| <i>Trim28 (chatwo)</i> | atgtgttgtgcccagta          | acctctgtgacctgcaac       | Shibata et al., 2011 | Restrict with BslI                                       |
| <i>Trim28 (L-)</i>     | ggaatggtttttcattgggtg      | ggcagcagcaaatcaagctcag   | Cammas et al., 2000  |                                                          |
| <i>Trim28 (L2)</i>     | ggaatggtttttcattgggtg      | acctggcccatttattgataaag  | Cammas et al., 2000  |                                                          |
| <i>Cre</i>             | ctaggccacagaattgaaagatct   | gtaggtggaattctagcatcatcc |                      |                                                          |
| D7Mit361               | tactaccaatgctaagcctacc     | accagagttgtgcccattc      | MIT marker, MGI      | CAST versus FVB SSLP near <i>H19</i> and <i>Kcnq1ot1</i> |
| D7Mit259               | cccctctctgacctctt          | gtctccatgggaaccacct      | MIT marker, MGI      | CAST versus FVB SSLP near <i>H19</i> and <i>Kcnq1ot1</i> |
| D7Mit316               | ccacacaatgccatacacg        | ftgctattcctgtatatgtatgc  | MIT marker, MGI      | CAST versus FVB SSLP near <i>Snrpn</i>                   |
| D12Mit80               | caaccagatgcccttaaca        | ctggaaggtttcactagttgg    | MIT marker, MGI      | CAST versus FVB SSLP near <i>Gtl2</i>                    |
| D2Mit265               | aataataatcaagttgtcattgaacc | tagtcaaaattctttgtgtgtgc  | MIT marker, MGI      | CAST versus FVB SSLP near <i>Gnas</i>                    |
| D17Mit114              | ggatccttagggctcacaca       | gcctattttccaattggca      | MIT marker, MGI      | CAST versus FVB SSLP near <i>Airn</i>                    |

**Supplemental Table I. Related to Experimental Procedures.** Primers used for genotyping, quantification of allele-specific expression and DMR methylation.
